# Supplementary material
Source: publisher site journal article supplement (https://www.dovepress.com/article/538836)
Supplement: Supplementary file 1 [file 538836%20Revised%20Supplementary%20Material.pdf]

## **Supplementary Material**

**Supplementary Table 1.** Evidence for the relationship between the 16 candidate mediators and estrogen-related gynecologic diseases from previous literature.

**Supplementary Table 2.** Univariable Mendelian Randomization Analyses of SES on estrogen-related gynecologic diseases.

**Supplementary Table 3.** Multivariable Mendelian Randomization Analyses of education on ovarian cancer.

**Supplementary Table 4.** Univariable Mendelian Randomization Analyses of education attainment on various sub-phenotypes of endometriosis.

**Supplementary Table 5.** Two-step Mendelian Randomization Analyses.

**Supplementary Figure 1.** MVMR estimates the causal associations of education with endometriosis.

**Supplementary Figure 2.** MVMR estimates the causal associations of education with two sub-phenotypes of endometriosis.

**Supplementary Figure 3.** MR leave-one-out sensitivity analysis for educational attainment on endometriosis of the uterus.

**Supplementary Figure 4.** Two-step MR identifying causal mediators in the association of educational attainment with endometriosis of uterus.

**Supplementary Table 1. Evidence for the relationship between the 16 candidate mediators and estrogen-related gynecologic diseases from previous literature.**

| Candidate mediators               | Evidence from previous literature                                                                                                                                                                                                                                                                                                                                                                                                                                                                                                                                               |
|-----------------------------------|---------------------------------------------------------------------------------------------------------------------------------------------------------------------------------------------------------------------------------------------------------------------------------------------------------------------------------------------------------------------------------------------------------------------------------------------------------------------------------------------------------------------------------------------------------------------------------|
| <b>Lifestyle (n=10)</b>           |                                                                                                                                                                                                                                                                                                                                                                                                                                                                                                                                                                                 |
| Diet (Carbohydrate, Fat, Protein) | Previous studies point to an association between diet and the development of endometriosis, which is unclear. It can be hypothesized that dietary factors influence the formation of sex hormones and exert pro- or antioxidant effects and proinflammatory effects. These factors play an essential role in the pathogenesis of endometriosis. A diet rich in red meat and a high intake of Palmitic acid or trans-unsaturated fats have been shown to increase the risk of endometriosis [1].                                                                                 |
| Coffee                            | A meta-analysis that included ten studies (five cohort and five case-control studies) showed that when stratified according to the level of consumption, high caffeine intake (>300 mg/day) was associated with increased risk of endometriosis (RR 1.30, 95%CI 1.04–1.63, I <sup>2</sup> = 56%) [2].                                                                                                                                                                                                                                                                           |
| <b>Sleep</b>                      |                                                                                                                                                                                                                                                                                                                                                                                                                                                                                                                                                                                 |
| Sleep duration                    | Data based on 45,748 participants aged 40–69 years from the Japan Public Health Center-based Prospective Study cohort revealed that among women who usually slept >7 h per day, an HR of 0.4 (95% CI 0.2–0.9) emerged compared to those who slept <6 h [3].                                                                                                                                                                                                                                                                                                                     |
| Sleeplessness/Insomnia            | Data based on 289,162 patients (144,581 and 144,581 in the sleep disorder and nonsleep disorder groups) of Taiwan's National Health Insurance (NHI) Research Database (NHIRD) revealed that the adjusted hazard ratio (aHR; 95% confidence interval [CI]) of cancer risk in the sleep disorder group compared with the nonsleep disorder group was 1.07 (1.04–1.12; P = 0.0001). The adjusted IRR (95% CIs) for ovarian cancer in patients with sleep disorders was 1.30 (1.10–1.52), which suggested that sleep disorder was a significant risk factor for ovarian cancer [4]. |
| <b>Physical activity</b>          |                                                                                                                                                                                                                                                                                                                                                                                                                                                                                                                                                                                 |
| MVPA                              | A study based on Nurses' Health Study II cohort revealed that strenuous activity during ages 12–13 was associated with endometriosis, which observed a 16% increase in the risk for endometriosis comparing the greatest amount of activity (≥80 MET-h/wk) with the least (<20 MET-h/wk) during ages 12–13 (RR=1.16, 95% CI=0.98–1.37, p-value test for trend=0.02) [5].                                                                                                                                                                                                        |
| Sedentary                         | A meta-analysis that included seven studies (three prospective cohort studies and four case-control studies, 2060 ovarian cancer cases in total) indicated a statistically significant increase in the risk of ovarian cancer in relation to prolonged sitting time (RR = 1.29, 95% CI= 1.07–1.57), comparing highest versus lowest levels of sedentary behavior [6].                                                                                                                                                                                                           |
| <b>Behavior</b>                   |                                                                                                                                                                                                                                                                                                                                                                                                                                                                                                                                                                                 |
| Smoking                           | Data based on 75,918 French women aged 40–65 from the E3N cohort revealed that there were positive linear associations between endometriosis risk and level of indoor exposure to passive smoking during childhood (OR = 1.34 [95% confidence interval =1.09–1.64] with several hours exposure a day) [7].                                                                                                                                                                                                                                                                      |

|                         |                                                                                                                                                                                                                                                                                                                                                                                                                                                                                                                                                                                                           |
|-------------------------|-----------------------------------------------------------------------------------------------------------------------------------------------------------------------------------------------------------------------------------------------------------------------------------------------------------------------------------------------------------------------------------------------------------------------------------------------------------------------------------------------------------------------------------------------------------------------------------------------------------|
| Alcohol                 | Alcohol intake could increase the level of estrogen in blood circulation and induce a variety of cells to produce proinflammatory cytokines, which may be related to the pathogenesis of endometriosis. A meta-analysis that included fifteen studies provided evidence for an association between alcohol consumption and endometriosis risk. Considering the results of the analyses of infrequent, moderate/regular, and heavy alcohol intake vs no alcohol intake, the summary RR estimates were, respectively, 1.14 (95% CI, 0.86-1.52), 1.23 (95% CI, 1.08-1.40), and 1.19 (95% CI, 0.99-1.43) [8]. |
| <b>Psychology (n=3)</b> |                                                                                                                                                                                                                                                                                                                                                                                                                                                                                                                                                                                                           |
| Major depression        | A genetic association study performed between September 13, 2021, and June 24, 2022, in 202,276 unrelated female participants (8,276 women with endometriosis and 194,000 controls) indicated the genetic liability to depression was associated with increased odds of endometriosis (OR, 1.09; 95% CI, 1.08-1.11), with the application of 1-sample mendelian randomization [9].                                                                                                                                                                                                                        |
| Schizophrenia           | A two-sample Mendelian randomization analysis determined a causal relationship between genetic predisposition to schizophrenia and cancer, with schizophrenia increasing ovarian cancer (OR = 1.0770; CI, 1.0352-1.1203; p = 0.0002) [10].                                                                                                                                                                                                                                                                                                                                                                |
| BIP                     | A real-world observational study that included 72 drug-naïve bipolar disorder (BD) patients, 98 healthy controls (HCs), and 72 BD patients with long-term medication indicated that drug-naïve BD patients presented higher rates of PCOS than the HCs (OR: 3.02, 95 % CI: 1.09 –8.36), and valproate is correlated with increased occurrence and development of PCOS [11].                                                                                                                                                                                                                               |
| <b>Biology (n=3)</b>    |                                                                                                                                                                                                                                                                                                                                                                                                                                                                                                                                                                                                           |
| Graves' disease         | A retrospective cohort study consisting of 5,399 patients with Graves disease (GD) and 10,798 patients without GD obtained from the National Health Insurance Research Database (NHIRD) indicated that the cumulative incidence curve of polycystic ovary syndrome (PCOS) in patients with GD was significantly higher than that in patients without GD (p = 0.02). The adjusted hazard ratio for PCOS in patients with GD compared with patients without GD was 1.47 (95%CI = 1.09–1.98) [12].                                                                                                           |
| Hashimoto thyroiditis   | The immune system seems to be involved in the pathogenesis of endometriosis. A retrospective case-control study consisting of 148 women with endometriosis and 150 controls aged between 18 and 45 indicated a significant correlation between endometriosis and autoimmune thyroiditis (p<.0001) [13].                                                                                                                                                                                                                                                                                                   |
| Type 1 diabetes         | A meta-analysis that included 48 articles showed a tendency towards a higher risk of ovarian cancer in those with type 1 diabetes mellitus (SIR 1.49, 95% CI 0.98 to 2.28); however, this was not statistically significant [14].                                                                                                                                                                                                                                                                                                                                                                         |

## REFERENCES

1. Zhang Y, Ma N-Y. Environmental Risk Factors for Endometriosis: An Umbrella Review of a Meta-Analysis of 354 Observational Studies With Over 5 Million Populations. *Front Med.* 2021;8:680833.
2. Kechagias KS, Katsikas Triantafyllidis K, Kyriakidou M, Giannos P, Kalliala I, Veroniki AA, et al. The Relation between Caffeine Consumption and Endometriosis: An Updated Systematic Review and Meta-Analysis. *Nutrients.* 2021;13:3457.
3. Weiderpass E, Sandin S, Inoue M, Shimazu T, Iwasaki M, Sasazuki S, et al. Risk factors for epithelial ovarian cancer in Japan - results from the Japan Public Health Center-based Prospective Study cohort. *Int J Oncol.* 2012;40:21–30.

4. Wu Zheng S-M, Chen J-W, Huang Y-M, Chen W-M, Wu S-Y. Effect of sleep disorders on the risks of cancers and site-specific cancers. *Sleep Med.* 2022;100:254–61.
5. Vitonis AF, Maruti SS, Hankinson SE, Hornstein MD, Missmer SA. Adolescent physical activity and endometriosis risk. *J Endometr.* 2009;1:157–63.
6. Biller VS, Leitzmann MF, Sedlmeier AM, Berger FF, Ortman O, Jochem C. Sedentary behaviour in relation to ovarian cancer risk: a systematic review and meta-analysis. *Eur J Epidemiol.* 2021;36:769–80.
7. Kvaskoff M, Bijon A, Clavel-Chapelon F, Mesrine S, Boutron-Ruault M-C. Childhood and adolescent exposures and the risk of endometriosis. *Epidemiol Camb Mass.* 2013;24:261–9.
8. Parazzini F, Cipriani S, Bravi F, Pelucchi C, Chiaffarino F, Ricci E, et al. A metaanalysis on alcohol consumption and risk of endometriosis. *Am J Obstet Gynecol.* 2013;209:106.e1-10.
9. Koller D, Pathak GA, Wendt FR, Tylee DS, Levey DF, Overstreet C, et al. Epidemiologic and Genetic Associations of Endometriosis With Depression, Anxiety, and Eating Disorders. *JAMA Netw Open.* 2023;6:e2251214.
10. Zhou K, Zhu L, Chen N, Huang G, Feng G, Wu Q, et al. Causal associations between schizophrenia and cancers risk: a Mendelian randomization study. *Front Oncol.* 2023;13:1258015.
11. Liu J, Teng Z, Xie H, Yuan H, Liu M, Chen J, et al. Prevalence and characteristics of polycystic ovarian syndrome in patients with bipolar disorder. *J Affect Disord.* 2023;340:387–95.
12. Chen H-H, Chen C-C, Hsieh M-C, Ho C-W, Hsu S-P, Yip H-T, et al. Graves' disease could increase polycystic ovary syndrome and comorbidities in Taiwan. *Curr Med Res Opin.* 2020;36:1063–7.
13. Porpora MG, Scaramuzzino S, Sangiuliano C, Piacenti I, Bonanni V, Piccioni MG, et al. High prevalence of autoimmune diseases in women with endometriosis: a case-control study. *Gynecol Endocrinol Off J Int Soc Gynecol Endocrinol.* 2020;36:356–9.
14. Wouters R, Vankerckhoven A, Verreet W, Ceusters J, Coosemans A. Do autoimmune diseases influence the onset and progression of ovarian cancer? A systematic review and meta-analysis. *Int J Gynecol Cancer Off J Int Gynecol Cancer Soc.* 2022;32:1583–91.

**Supplementary Table 2. Univariable Mendelian Randomization Analyses of SES on estrogen-related gynecologic diseases.**

| exposure                                    | outcome                   | Number of SNPs | Inverse variance weighted |         | Weighted median   |         | MR Egger             |         |
|---------------------------------------------|---------------------------|----------------|---------------------------|---------|-------------------|---------|----------------------|---------|
|                                             |                           |                | OR (95% CI)               | P-value | OR (95% CI)       | P-value | OR (95% CI)          | P-value |
| Educational attainment (years of education) | Endometriosis             | 198            | 0.94 (0.91, 0.98)         | 0.001   | 0.94 (0.89, 0.99) | 0.014   | 0.84 (0.72, 0.99)    | 0.044   |
|                                             | Endometrial cancer        | 202            | 1.02 (0.97, 1.08)         | 0.417   | 1.02 (0.94, 1.10) | 0.686   | 0.95 (0.75, 1.21)    | 0.703   |
|                                             | Ovarian cancer            | 202            | 1.08 (1.01, 1.15)         | 0.027   | 1.06 (0.96, 1.16) | 0.244   | 0.99 (0.74, 1.32)    | 0.927   |
|                                             | Uterine fibroids          | 202            | 1.01 (0.99, 1.03)         | 0.395   | 1.01 (0.98, 1.04) | 0.500   | 1.00 (0.91, 1.10)    | 0.938   |
|                                             | polycystic ovary syndrome | 180            | 1.03 (0.97, 1.08)         | 0.374   | 1.04 (0.96, 1.12) | 0.385   | 0.99 (0.77, 1.28)    | 0.931   |
| Average total household income before tax   | Endometriosis             | 41             | 0.97 (0.66, 1.43)         | 0.877   | 0.83 (0.51, 1.35) | 0.447   | 0.25 (0.03, 1.79)    | 0.175   |
|                                             | Endometrial cancer        | 23             | 1.58 (0.79, 3.18)         | 0.197   | 1.65 (0.62, 4.42) | 0.318   | 2.18 (0.09, 53.98)   | 0.638   |
|                                             | Ovarian cancer            | 42             | 1.58 (0.87, 2.84)         | 0.130   | 1.72 (0.79, 3.77) | 0.174   | 1.47 (0.14, 15.63)   | 0.750   |
|                                             | Uterine fibroids          | 22             | 0.90 (0.70, 1.16)         | 0.420   | 0.95 (0.67, 1.36) | 0.782   | 1.21 (0.53, 2.74)    | 0.661   |
|                                             | polycystic ovary syndrome | 23             | 0.86 (0.41, 1.78)         | 0.685   | 1.73 (0.69, 4.33) | 0.244   | 13.01 (0.50, 339.04) | 0.138   |
| Occupational attainment                     | Endometriosis             | 24             | 0.95 (0.77, 1.17)         | 0.622   | 0.80 (0.63, 1.01) | 0.061   | 0.49 (0.14, 1.77)    | 0.289   |
|                                             | Endometrial cancer        | 16             | 1.31 (0.89, 1.93)         | 0.177   | 1.33 (0.85, 2.07) | 0.215   | 0.57 (0.04, 8.43)    | 0.688   |
|                                             | Ovarian cancer            | 23             | 0.92 (0.69, 1.23)         | 0.582   | 1.07 (0.71, 1.61) | 0.735   | 1.22 (0.19, 7.86)    | 0.839   |
|                                             | Uterine fibroids          | 15             | 0.97 (0.87, 1.09)         | 0.636   | 0.96 (0.82, 1.12) | 0.601   | 0.44 (0.21, 0.93)    | 0.052   |
|                                             | polycystic ovary syndrome | 13             | 1.03 (0.71, 1.50)         | 0.889   | 0.98 (0.61, 1.55) | 0.919   | 0.81 (0.07, 8.92)    | 0.865   |

SNPs, single-nucleotide polymorphisms; OR, odds ratio; CI, confidence interval.

**Supplementary Table 3. Multivariable Mendelian Randomization Analyses of education on ovarian cancer.**

| <b>Analysis</b>                    | <b>Method</b> | <b>Number of SNPs</b> | <b>OR (95% CI)</b> | <b>P-value</b> |
|------------------------------------|---------------|-----------------------|--------------------|----------------|
| Education, unadjusted              | Education     | 202                   | 1.08 (1.01, 1.15)  | 0.027          |
| Education, adjusted for WHR        | Education     | 109                   | 1.08 (1.00, 1.16)  | 0.124          |
|                                    | WHR           | 259                   | 0.98 (0.79, 1.21)  | 0.821          |
| Education, adjusted for AM         | Education     | 166                   | 1.05 (0.98, 1.13)  | 0.016          |
|                                    | AM            | 82                    | 1.29 (1.07, 1.57)  | 0.201          |
| Education, adjusted for WHR and AM | Education     | 98                    | 1.05 (0.97, 1.14)  | 0.332          |
|                                    | WHR           | 220                   | 0.94 (0.75, 1.18)  | 0.591          |
|                                    | AM            | 58                    | 1.23 (1.01, 1.50)  | 0.126          |

WHR, waist-hip ratio; AM, age at menopause; SNPs, single-nucleotide polymorphisms; OR, odds ratio; CI, confidence interval.

**Supplementary Table 4. Univariable Mendelian Randomization Analyses of education attainment on various sub-phenotypes of endometriosis.**

| exposure                                    | outcome                                         | Number of SNPs | Inverse variance weighted |         | Weighted median   |         | MR Egger          |         |
|---------------------------------------------|-------------------------------------------------|----------------|---------------------------|---------|-------------------|---------|-------------------|---------|
|                                             |                                                 |                | OR (95% CI)               | P-value | OR (95% CI)       | P-value | OR (95% CI)       | P-value |
| Educational attainment (years of education) | Endometriosis of uterus                         | 197            | 0.91 (0.86, 0.98)         | 0.007   | 0.90 (0.81, 0.99) | 0.028   | 0.84 (0.63, 1.11) | 0.225   |
|                                             | Endometriosis of ovary                          | 199            | 0.98 (0.93, 1.04)         | 0.531   | 0.96 (0.89, 1.04) | 0.365   | 0.90 (0.71, 1.15) | 0.397   |
|                                             | Endometriosis of fallopian tube                 | 196            | 0.86 (0.65, 1.14)         | 0.299   | 0.89 (0.59, 1.34) | 0.578   | 1.48 (0.43, 5.07) | 0.537   |
|                                             | Endometriosis of pelvic peritoneum              | 197            | 0.94 (0.88, 0.99)         | 0.028   | 0.96 (0.88, 1.05) | 0.375   | 0.88 (0.68, 1.14) | 0.348   |
|                                             | Endometriosis of intestine                      | 198            | 0.94 (0.75, 1.18)         | 0.590   | 0.90 (0.64, 1.26) | 0.526   | 1.04 (0.38, 2.84) | 0.939   |
|                                             | Endometriosis of rectovaginal septum and vagina | 195            | 0.98 (0.90, 1.06)         | 0.612   | 0.98 (0.86, 1.10) | 0.689   | 0.83 (0.57, 1.21) | 0.332   |

SNPs, single-nucleotide polymorphisms; OR, odds ratio; CI, confidence interval.

**Supplementary Table 5. Two-step Mendelian Randomization Analyses.**

| exposure                                    | outcome                 | Number of SNPs | Inverse variance weighted |          | Weighted median   |          | MR Egger          |         |
|---------------------------------------------|-------------------------|----------------|---------------------------|----------|-------------------|----------|-------------------|---------|
|                                             |                         |                | OR (95% CI)               | P-value  | OR (95% CI)       | P-value  | OR (95% CI)       | P-value |
| Educational attainment (years of education) | depression              | 203            | 0.97 (0.95, 0.98)         | 3.21E-05 | 0.97 (0.96, 0.98) | 4.63E-05 | 0.94 (0.88, 1.00) | 0.052   |
| depression                                  | Endometriosis of uterus | 44             | 1.43 (1.01, 2.02)         | 0.043    | 1.43 (0.88, 2.32) | 0.149    | 0.84 (0.11, 6.57) | 0.872   |

SNPs, single-nucleotide polymorphisms; OR, odds ratio; CI, confidence interval.

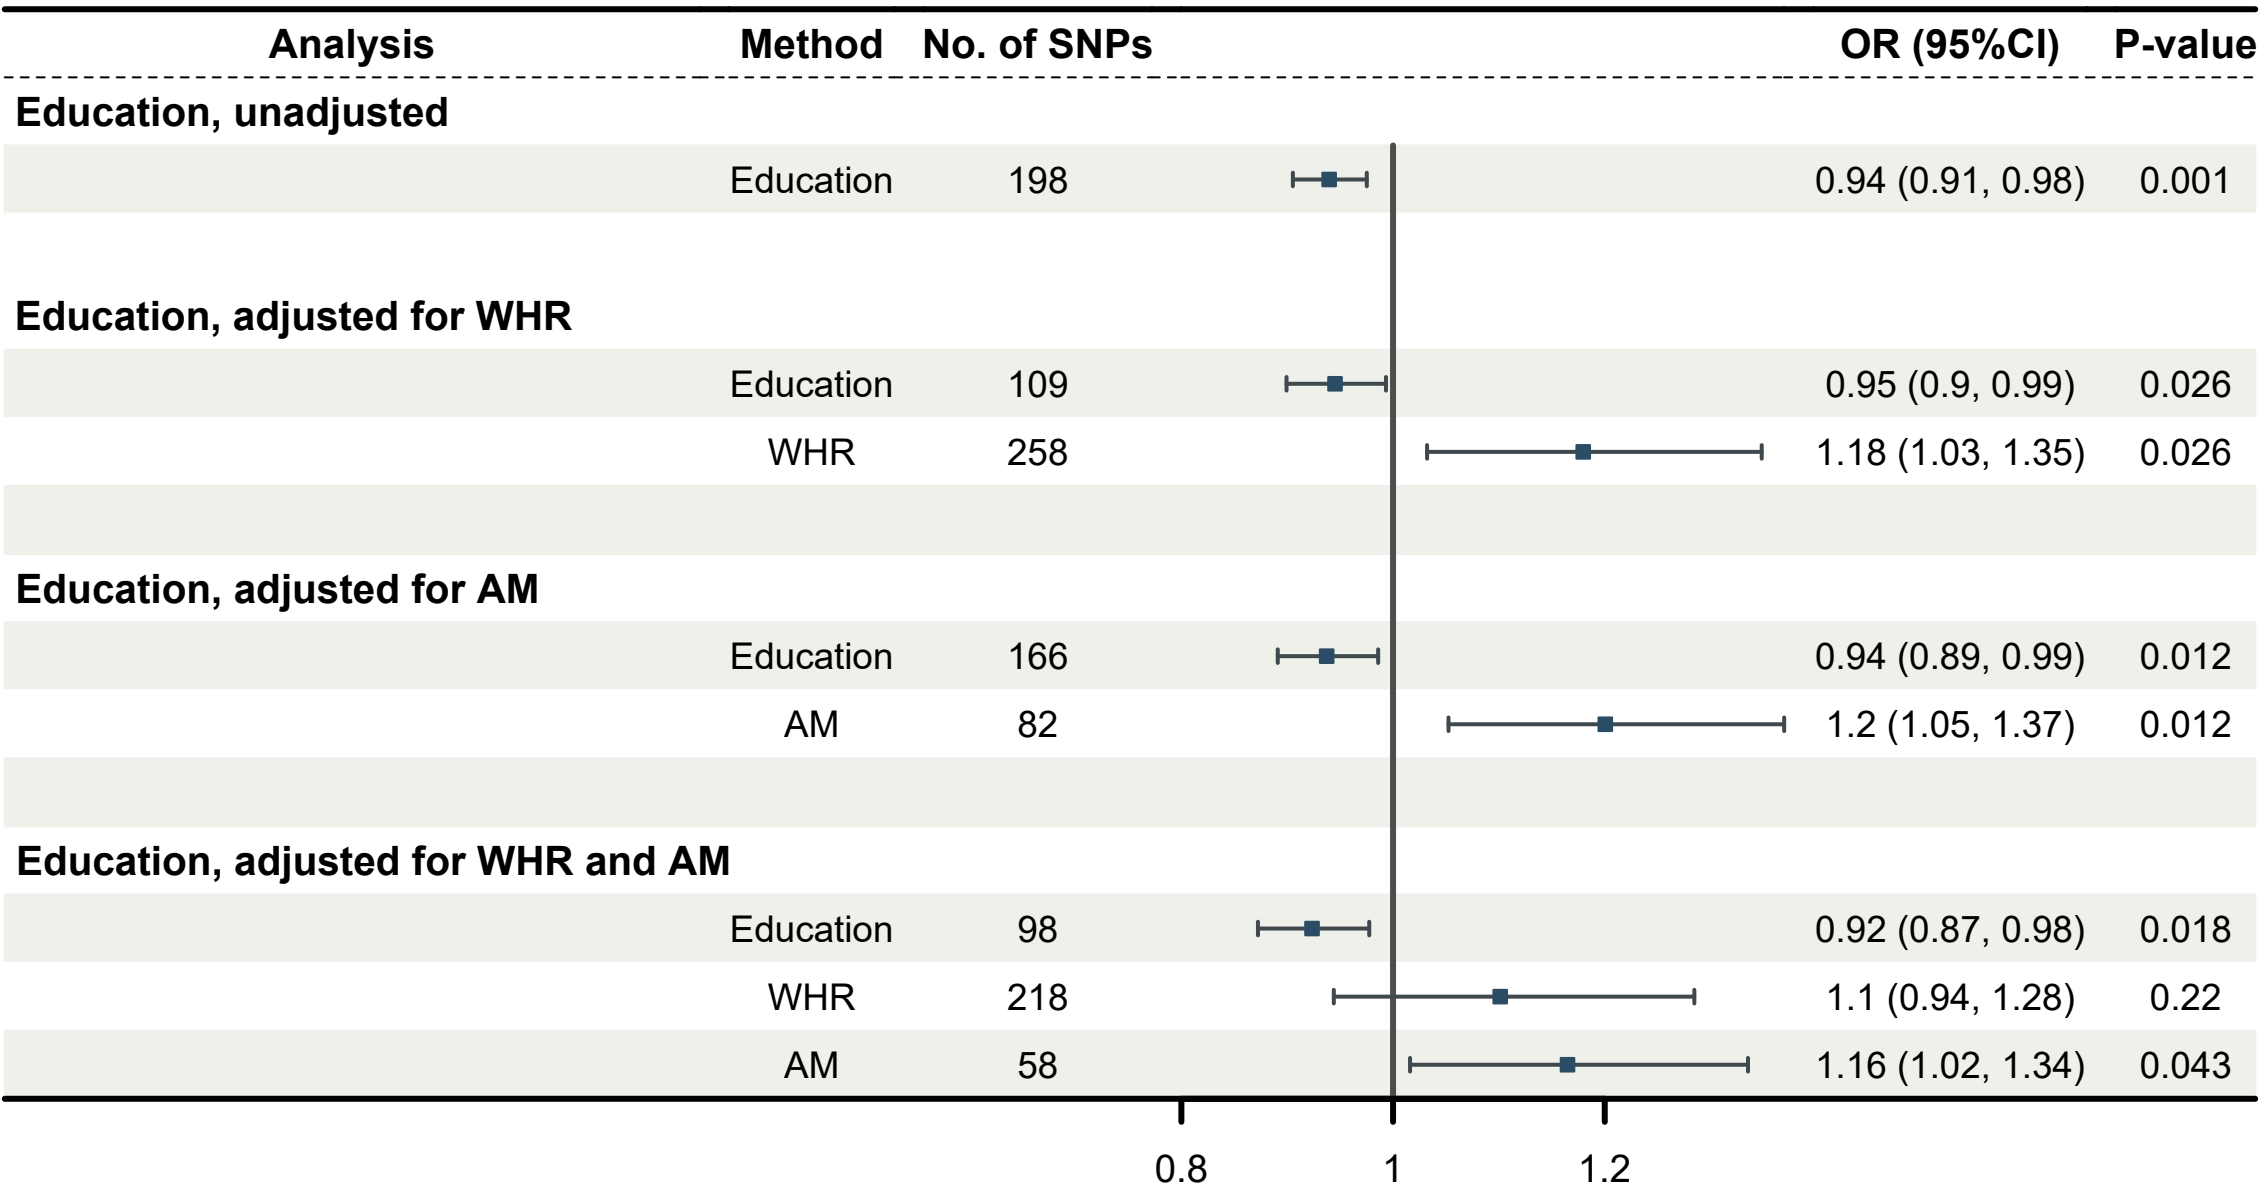

**A**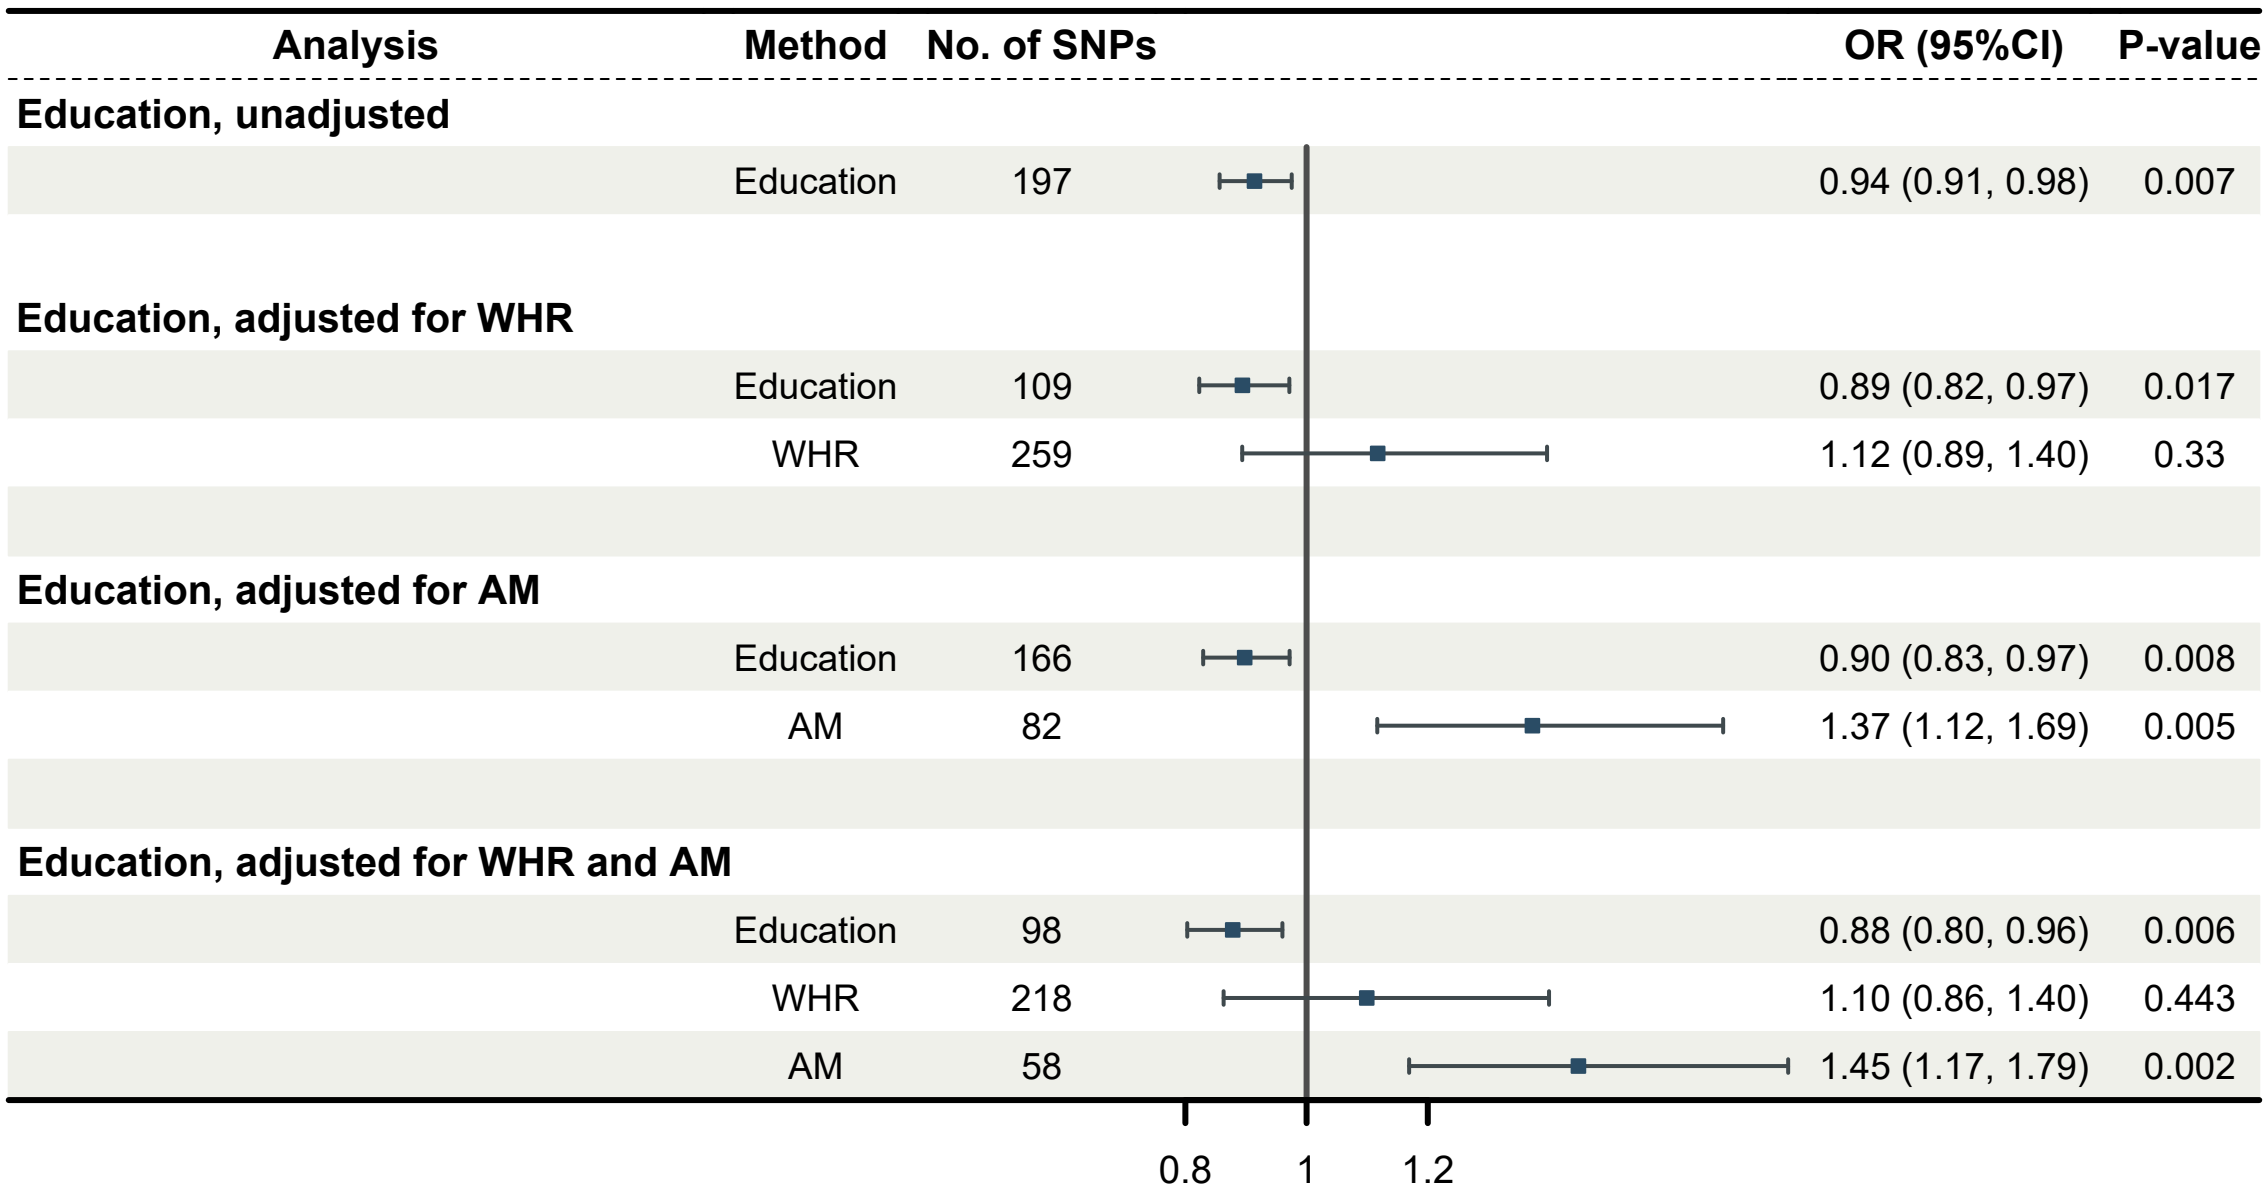**B**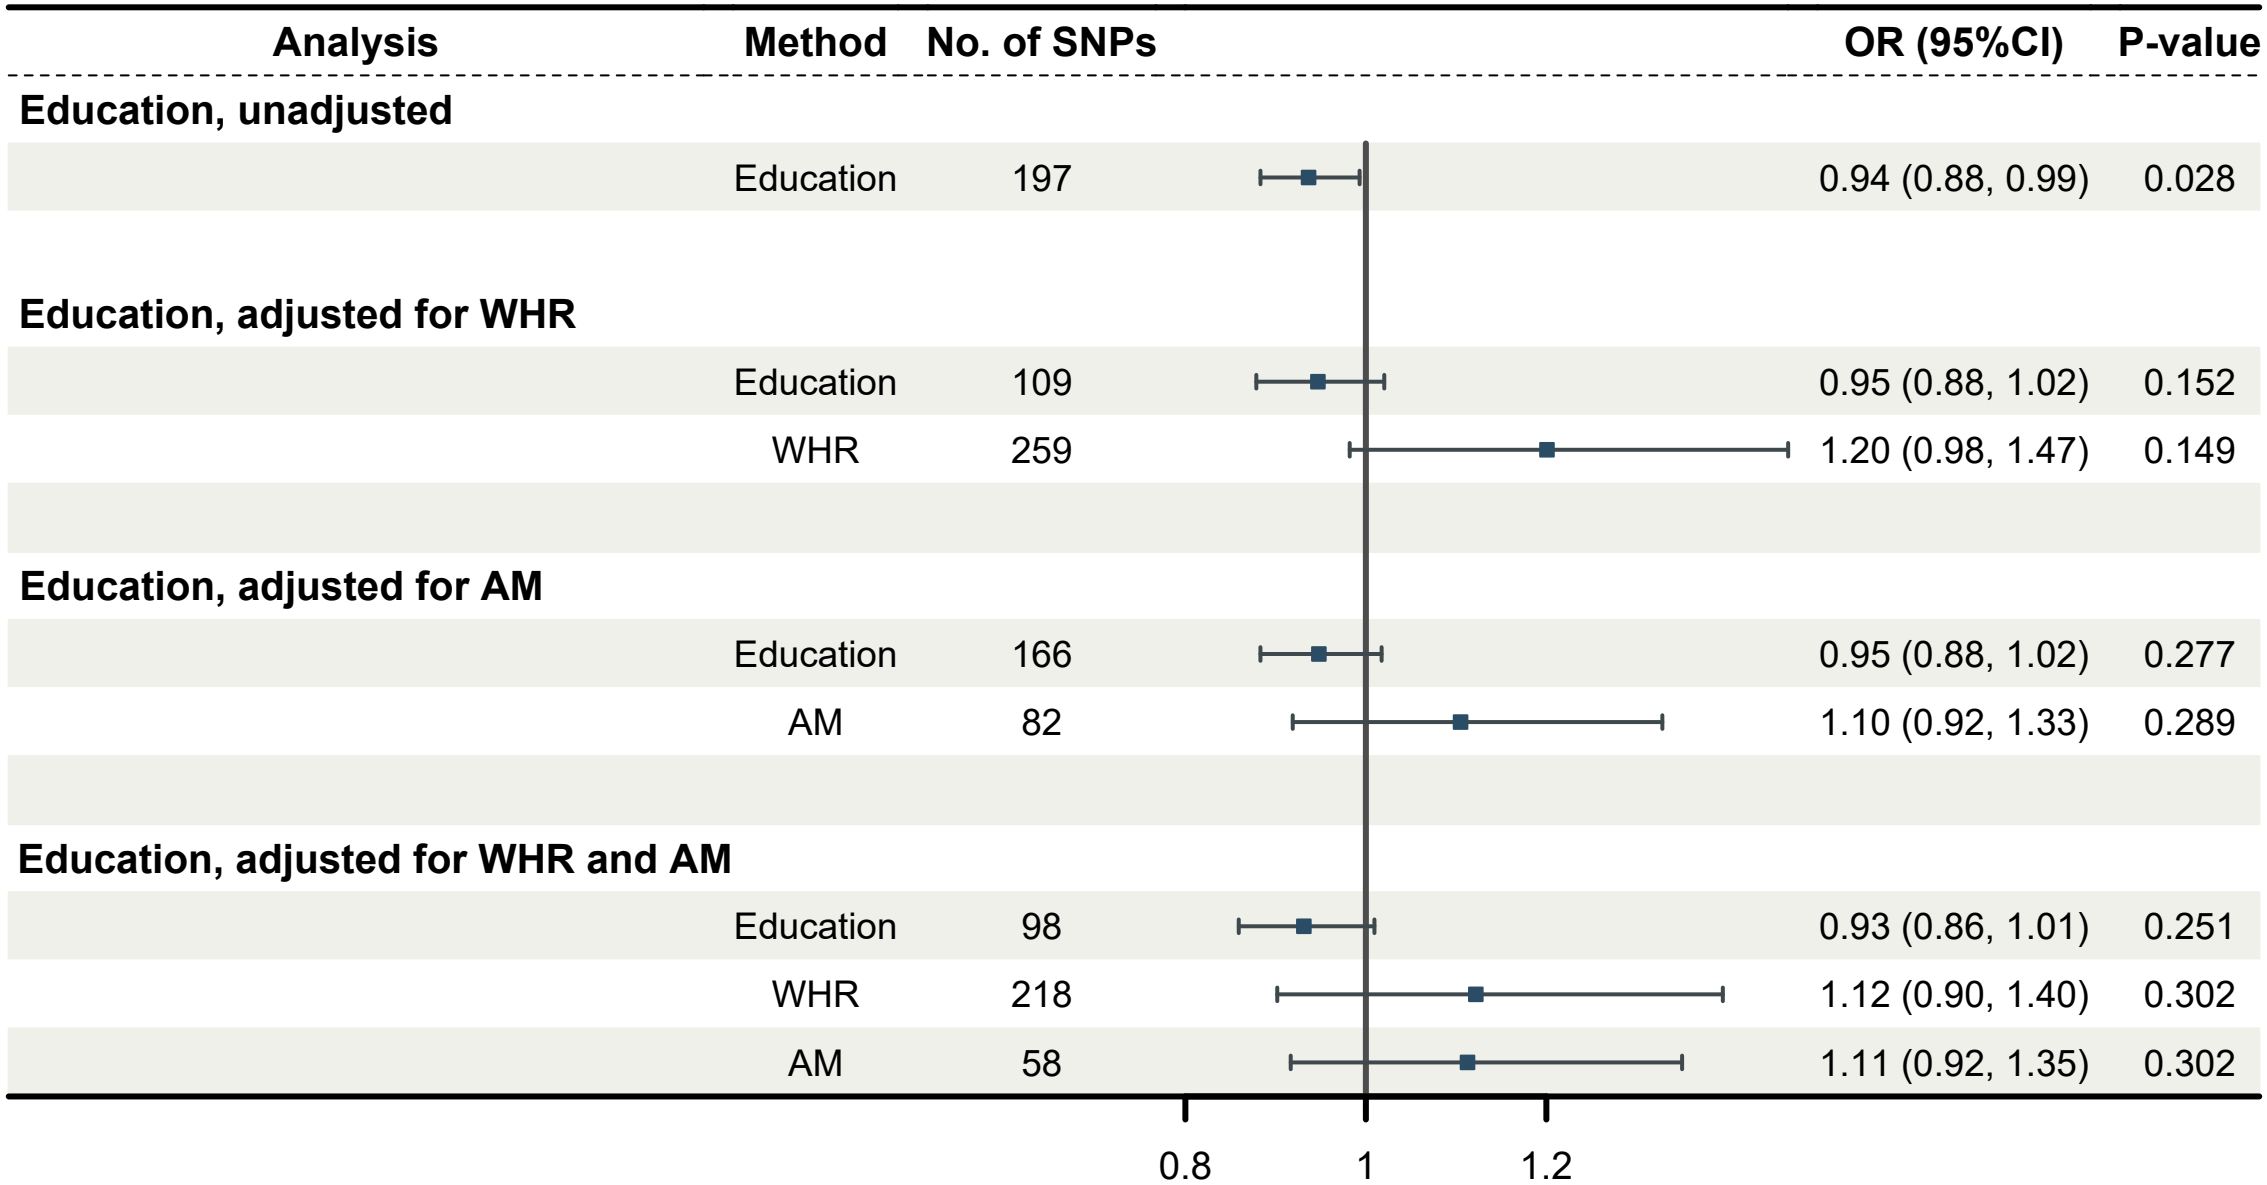

rs2411453  
rs1180221  
rs2725371  
rs67651814  
rs75033012  
rs185291  
rs10215082  
rs2834011  
rs38009225  
rs3847225  
rs55842281  
rs1334297  
rs2290998  
rs1786984  
rs34945223  
rs2309812  
rs66844142  
rs3825083  
rs34364916  
rs7262517  
rs11714679  
rs10994777  
rs9797233  
rs324801  
rs417968  
rs1675394  
rs1689510  
rs55800473  
rs8057898  
rs6779254  
rs1892417  
rs7702339  
rs4958568  
rs76608582  
rs11068409  
rs7988201  
rs78452560  
rs10518019  
rs2735421  
rs2570487  
rs34470581  
rs12804787  
rs7070693  
rs1758776  
rs34042385  
rs3943093  
rs690579  
rs3827531  
rs7873964  
rs6238938  
rs72807818  
rs12921005  
rs11635966  
rs11678980  
rs91787087  
rs17513684  
rs7531271  
rs11155821  
rs215632  
rs12029888  
rs2604541  
rs118083122  
rs11693764  
rs42210  
rs917614  
rs4731992  
rs12132451  
rs13409451  
rs1566085  
rs17499649  
rs12414895  
rs2332818  
rs7583473  
rs670772  
rs4726070  
rs12663818  
rs1526112  
rs4808766  
rs9123361  
rs6682095  
rs7768116  
rs4246167  
rs1788783  
rs7966054  
rs1969165  
rs4785653  
rs868698  
rs251324  
rs6071573  
rs62182125  
rs2559509  
rs11720121  
rs11764590  
rs1964927  
rs1133947  
rs10745789  
rs7868164  
rs1089484  
rs62184483  
rs11690224  
rs1381247  
rs10058365  
rs2706762  
rs781289  
rs6556982  
rs6429911  
rs62018215  
rs6789699  
rs7233920  
rs575113  
rs2145265  
rs11604034  
rs10189857  
rs175325  
rs5859553  
rs7687869  
rs7031698  
rs11732657  
rs1583286  
rs77675579  
rs145590108  
rs1059847  
rs4130477  
rs6178785  
rs5611854  
rs7981770  
rs363096  
rs7349064  
rs11915747  
rs660001  
rs55972852  
rs879394  
rs9020034  
rs72674898  
rs115877304  
rs2974312  
rs711793  
rs10760023  
rs1963862  
rs12735232  
rs35811586  
rs837065  
rs1871429  
rs1917008  
rs1369128  
rs7598246  
rs1835340  
rs61868084  
rs2988309  
rs34192341  
rs17563464  
rs1010334  
rs12503522  
rs2190672  
rs11249939  
rs67944653  
rs62253608  
rs1812587  
rs10511592  
rs9888796  
rs1880692  
rs2820313  
rs702606  
rs73040036  
rs72977992  
rs11243838  
rs75433564  
rs35917528  
rs4700393  
rs192436652  
rs12574281  
rs11572842  
rs11214468  
rs1391438  
rs2175420  
rs3503975  
rs79937071  
rs9643120  
rs3747631  
rs7988627  
rs35091253  
rs11736883  
rs8008382  
rs7195278  
rs1820977  
rs7629643  
rs4757957  
rs71646142  
rs10765775  
rs3788556  
rs3794620  
rs11661305  
rs10844179  
rs12967855  
rs6935954  
rs12532494  
rs12468040

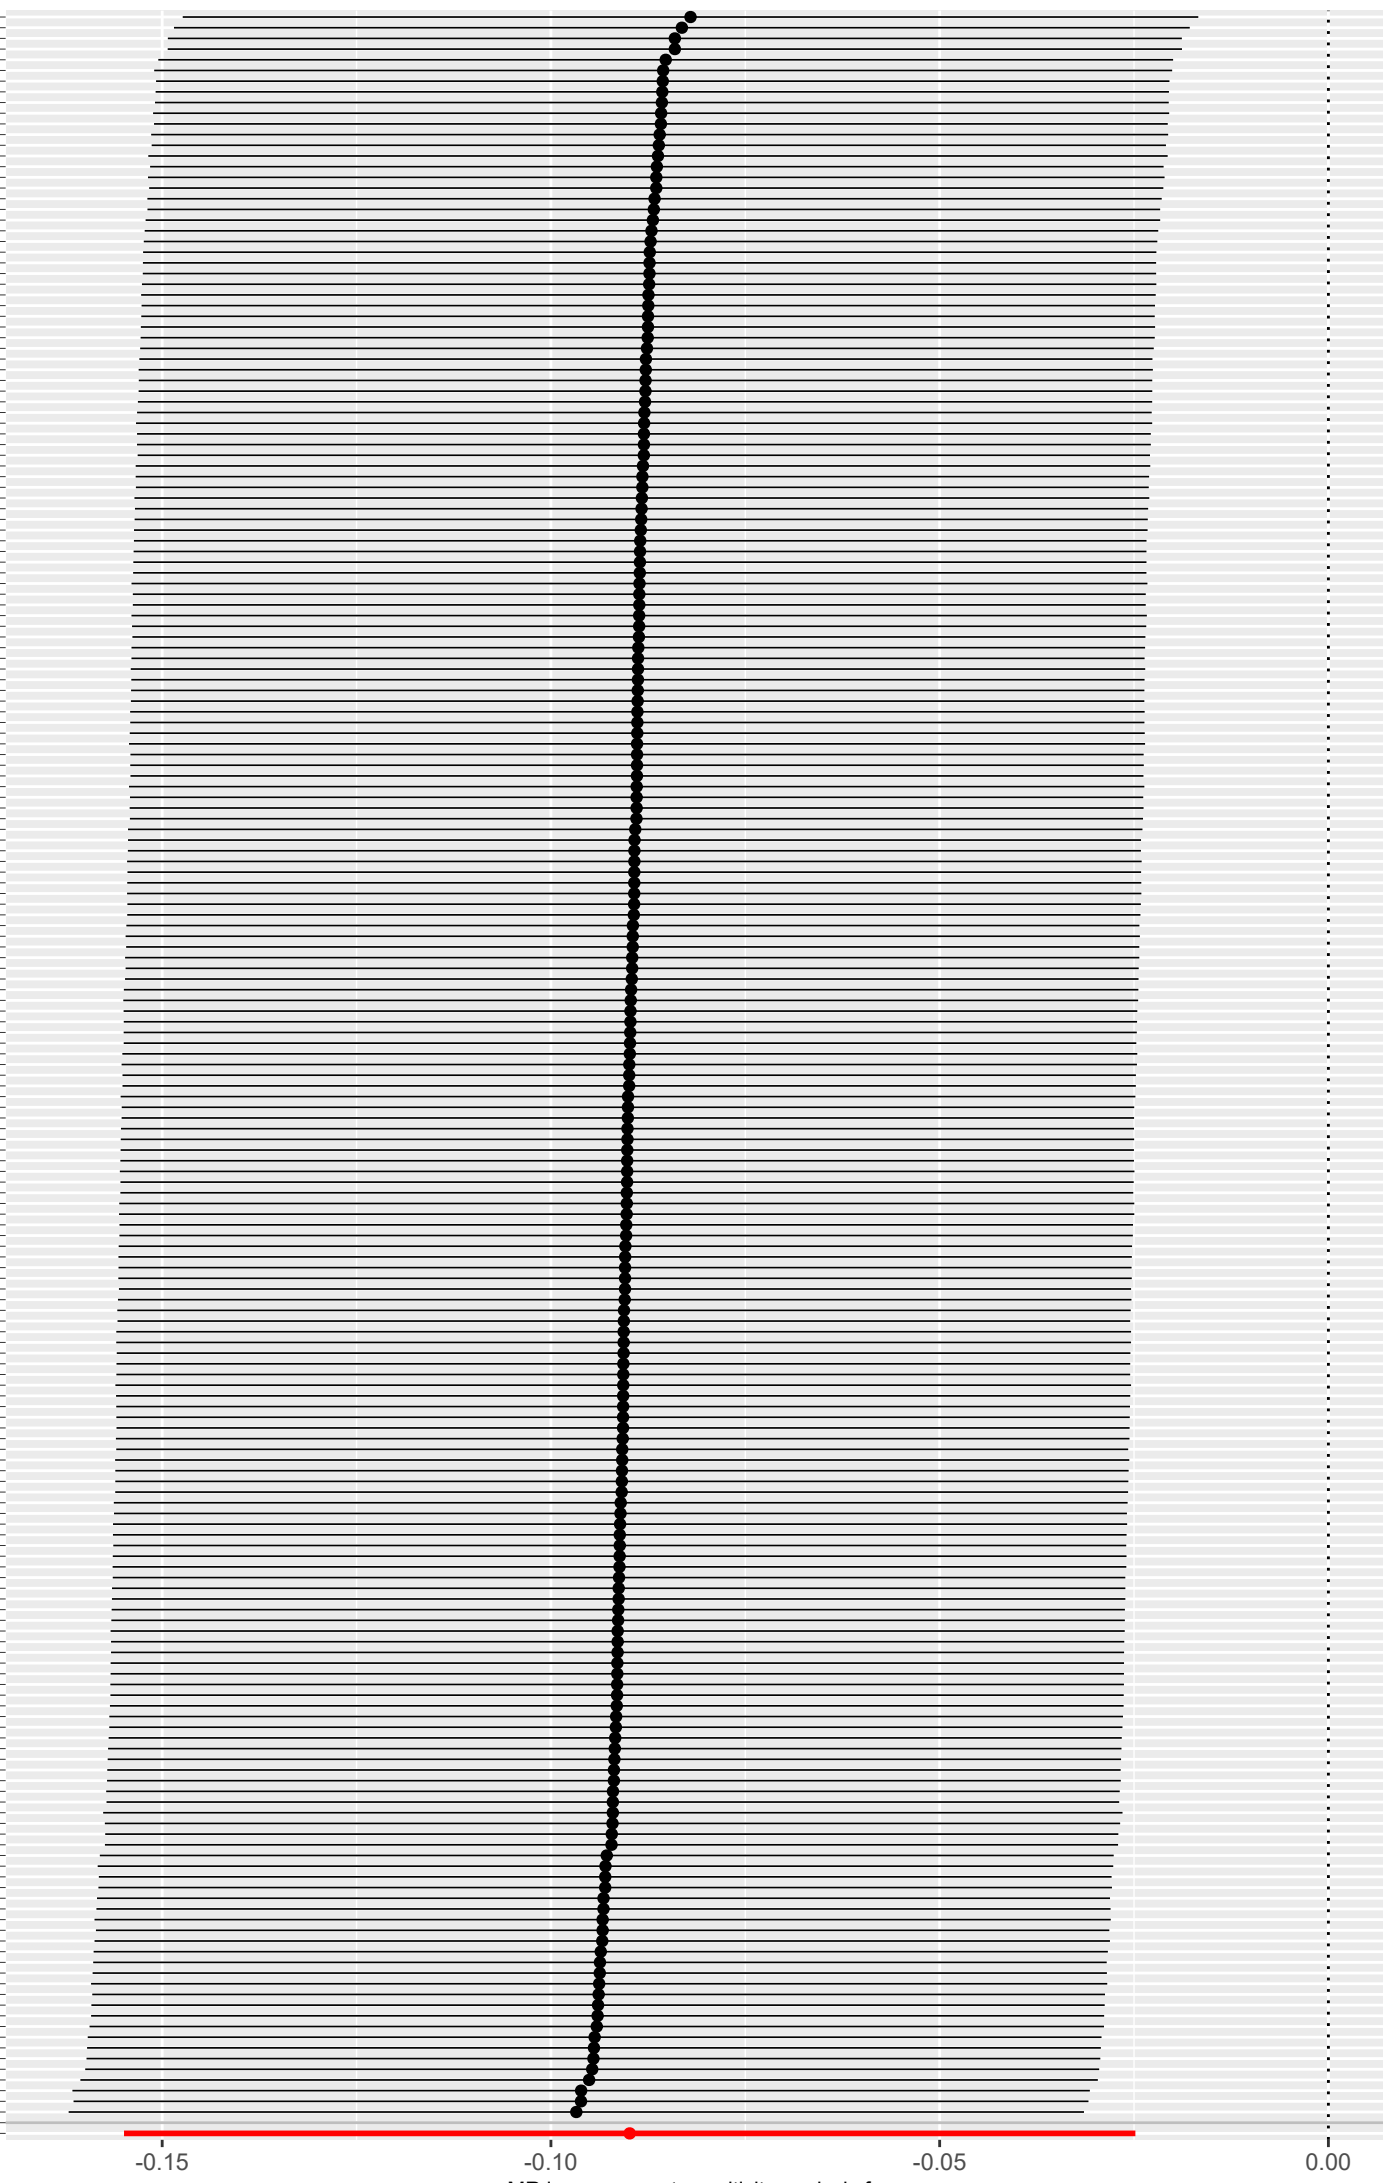

MR leave-one-out sensitivity analysis for 'Educational attainment (years of education) || id:ebi-a-GCST90029013' on 'Endometriosis of uterus || id:finn-b-N14\_ENDOMETRIOSIS\_UTERUS'

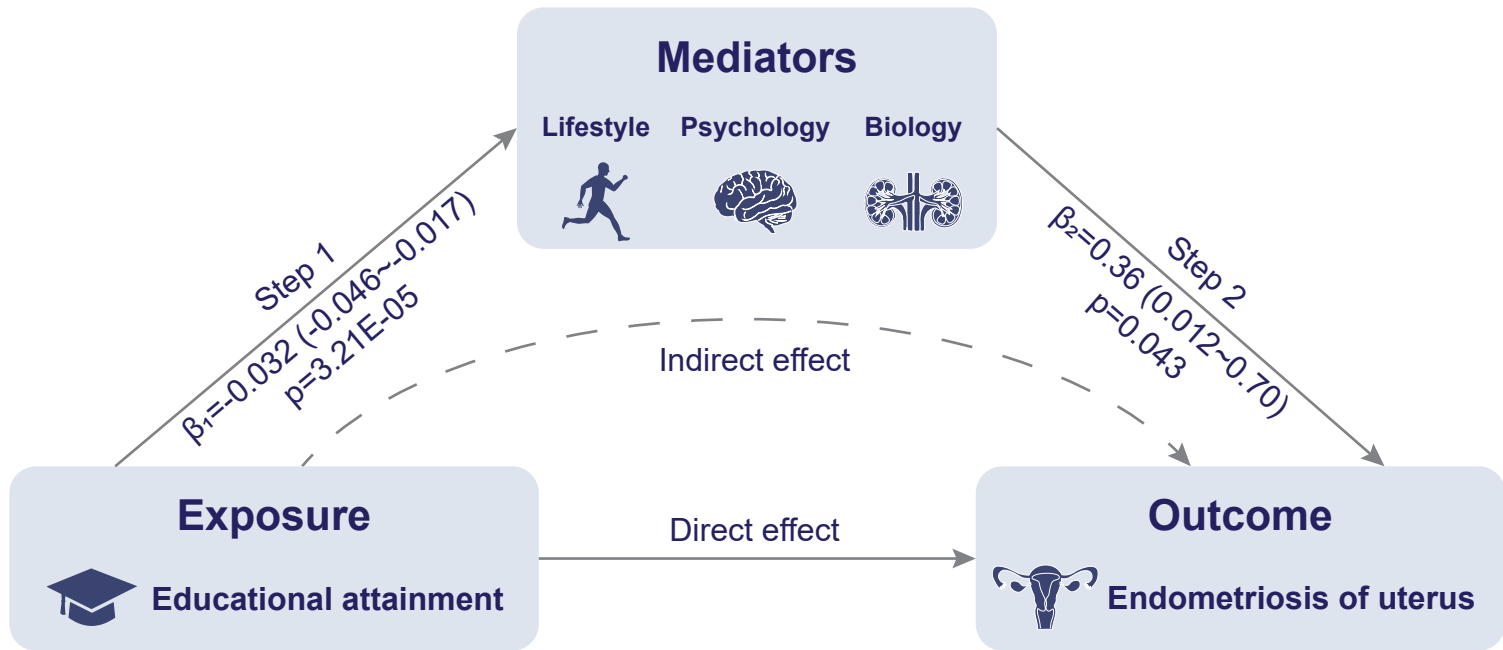

| Mediator   | Total effect          | Mediated effect         | Mediated proportion |
|------------|-----------------------|-------------------------|---------------------|
|            | $\beta$ (95%CI)       | $\beta$ (95%CI)         | % (95%CI)           |
| <b>MDD</b> | -0.090 (-0.15~-0.025) | -0.011 (-0.023~-0.0019) | 12.22 (2.11~25.56)  |

## **Figure legend**

**Supplementary Figure 1. MVMR estimates the causal associations of education with endometriosis.**

In MVMR (adjust for waist-hip ratio and age at menopause), genetically predicted longer years of education remained causally associated with a low risk of endometriosis.

**Supplementary Figure 2. MVMR estimates the causal associations of education with two sub-phenotypes of endometriosis.**

(A) MVMR analysis provided evidence for a consistent, causal, protective effect of education on endometriosis of the uterus. (B) The association with endometriosis of the pelvic peritoneum was no longer statistically significant.

**Supplementary Figure 3. MR leave-one-out sensitivity analysis for educational attainment on endometriosis of the uterus.**

**Supplementary Figure 4. Two-step MR identifying causal mediators in the association of educational attainment with endometriosis of uterus.**
